# Supplementary material
Source: publisher figshare collection journal article supplement (https://frontiersin.figshare.com/ndownloader/files/15353246)
Supplement: Supplementary file [file 15353246]

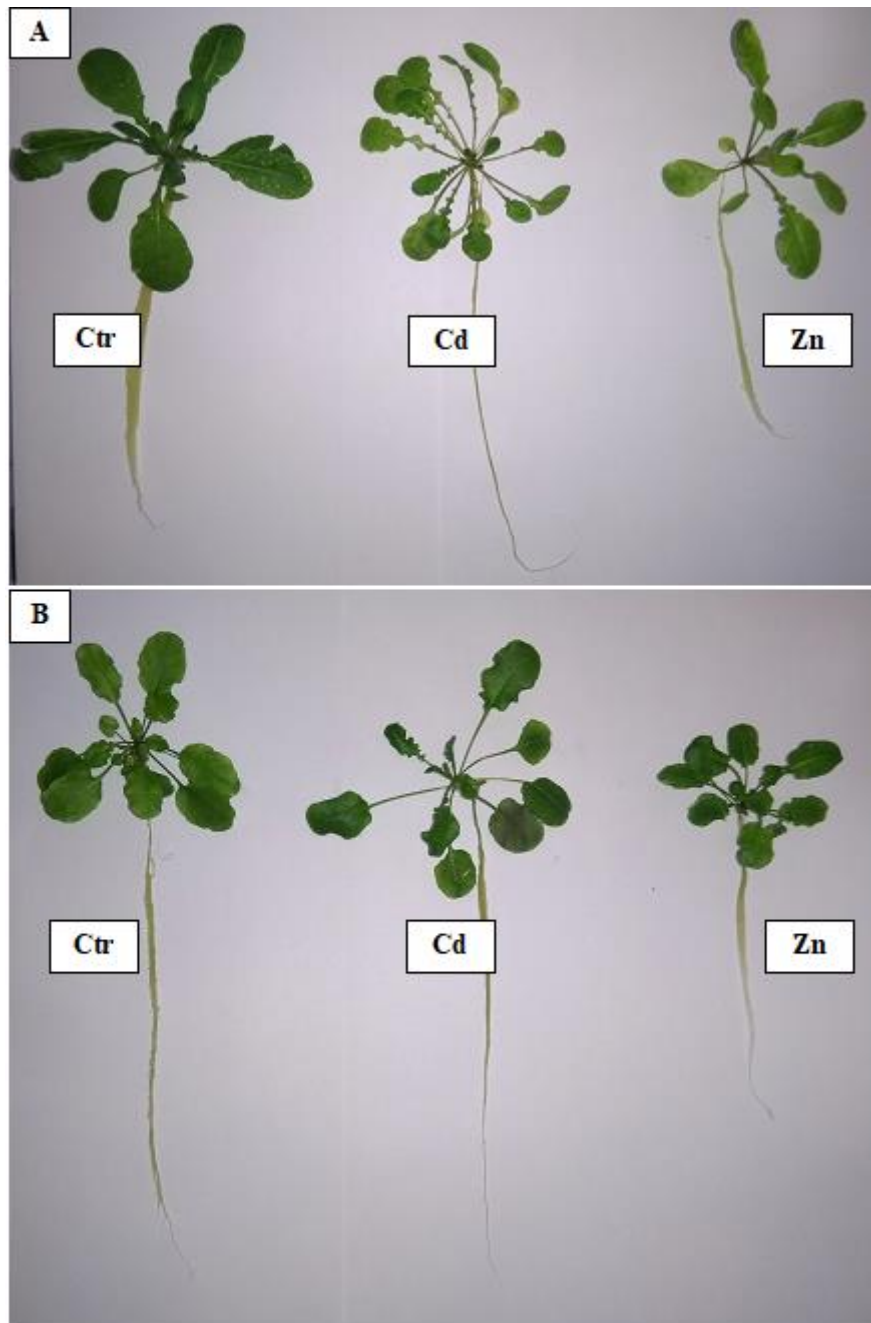

**Figure S2.** The pictures of *A. arenosa* (A) and *A. halleri* (B) at the end of experiment; Ctr – control; Cd – 1.0 mM Cd treatment; Zn – 5.0 mM Zn treatment.
